# Supplementary material
Source: PubMed Central journal article supplement (PMC3394849)
Supplement: supp_111990_zinc-science-1-at.pdf [file supp_111990_zinc-science-1-at.pdf]

**Appendix 1 (as supplied by the authors): Search strategy for trials (run as of September 30, 2011)**

| #  | Ovid MEDLINE                                                                                                                                                                                                                                                                                                                                                                                                                                                                                                                                                                                          | Results |
|----|-------------------------------------------------------------------------------------------------------------------------------------------------------------------------------------------------------------------------------------------------------------------------------------------------------------------------------------------------------------------------------------------------------------------------------------------------------------------------------------------------------------------------------------------------------------------------------------------------------|---------|
| 1  | Zinc/ or Zinc Acetate/ or (zinc/ and acetic acid/) or zinc acetate (nm) or (zinc adj2 acetate).ti,ab. or Zinc Sulfate/ or ZINC SULFATE (nm) or (zinc/ and sulfates/) or (zinc adj2 sulfate*).ti,ab. or (zinc/ and gluconates/) or (zinc adj2 gluconate).ti,ab. or zinc.ti,ab. or ("ascaro L 15" or "blue powder" or "CCRIS 1582" or CCRIS1582 or "EINECS 231-175-3" or "EINECS 2311753" or EINECS2311753 or "HSDB 1344" or HSDB1344 or jasad or "LS 2" or LS2 or "LS 6" or LS6 or merrillite* or rheinzink or "zincum metallicum").mp.                                                                | 79455   |
| 2  | exp respiratory tract infections/ or (common adj2 cold*).ti,ab. or (upper adj2 respiratory).ti,ab. or (cold or colds).ti,ab. or Rhinovirus/ or rhinovirus*.ti,ab.                                                                                                                                                                                                                                                                                                                                                                                                                                     | 338877  |
| 3  | 1 and 2                                                                                                                                                                                                                                                                                                                                                                                                                                                                                                                                                                                               | 863     |
| 4  | (controlled clinical trial or meta analysis or multicenter study or randomized controlled trial).pt. or randomized controlled trials as topic/ or controlled clinical trials as topic/ or multicenter study as topic/ or meta analysis as topic/ or random allocation/ or double-blind method/ or single-blind method/ or (random* or (doubl* adj2 dummy) or ((Singl* or doubl* or trebl* or tripl*) adj5 (blind* or mask*)) or RCT or RCTs or (control* adj5 trial*) or multicent* or placebo* or metaanalys* or (meta adj5 analys*) or sham or effectiveness or efficacy or compar*).ti,ab. 3458987 | 3712555 |
| 5  | 3 and 4                                                                                                                                                                                                                                                                                                                                                                                                                                                                                                                                                                                               | 348     |
| 6  | (controlled clinical trial or randomized controlled trial).pt. or randomized.ab. or dt.fs. or randomly.ab. or trial.ab. or groups.ab.                                                                                                                                                                                                                                                                                                                                                                                                                                                                 | 2790165 |
| 7  | exp animals/ not humans/                                                                                                                                                                                                                                                                                                                                                                                                                                                                                                                                                                              | 3707268 |
| 8  | 6 not 7                                                                                                                                                                                                                                                                                                                                                                                                                                                                                                                                                                                               | 2368495 |
| 9  | 3 and 8                                                                                                                                                                                                                                                                                                                                                                                                                                                                                                                                                                                               | 285     |
| 10 | 5 not 9                                                                                                                                                                                                                                                                                                                                                                                                                                                                                                                                                                                               | 156     |
| 11 | 4 or 8                                                                                                                                                                                                                                                                                                                                                                                                                                                                                                                                                                                                | 4980957 |
| 12 | 3 and 11                                                                                                                                                                                                                                                                                                                                                                                                                                                                                                                                                                                              | 441     |

| # | EMBASE                                                                                                                                                                                                                                                                                                                                                                                                                                                  | Results |
|---|---------------------------------------------------------------------------------------------------------------------------------------------------------------------------------------------------------------------------------------------------------------------------------------------------------------------------------------------------------------------------------------------------------------------------------------------------------|---------|
| 1 | zinc/ or exp zinc acetate/ or zinc sulfate/ or gluconate zinc/ or zinc derivative/ or (zinc adj2 acetate).ti,ab. or (zinc adj2 sulfate*).ti,ab. or (zinc adj2 gluconate).ti,ab. or zinc.ti,ab. or ("ascaro L 15" or "blue powder" or "CCRIS 1582" or CCRIS1582 or "EINECS 231-175-3" or "EINECS 2311753" or EINECS2311753 or "HSDB 1344" or HSDB1344 or jasad or "LS 2" or LS2 or "LS 6" or LS6 or merrillite* or rheinzink or "zincum metallicum").mp. | 110739  |
| 2 | exp Rhinovirus infection/ or exp rhinovirus/ or exp respiratory tract infection/ or (common adj2 cold*).ti,ab. or (upper adj2 respiratory).ti,ab. or (cold or colds).ti,ab. or rhinovirus*.ti,ab.                                                                                                                                                                                                                                                       | 344157  |
| 3 | 1 and 2                                                                                                                                                                                                                                                                                                                                                                                                                                                 | 1293    |
| 4 | ct.fs. or controlled clinical trial/ or randomized controlled trial/ or multicenter study/ or meta analysis/ or (random* or (doubl* adj2 dummy) or ((Singl* or doubl* or trebl* or tripl*) adj5 (blind* or mask*)) or RCT or RCTs or (control* adj5 trial*) or multicent* or placebo* or metaanalys* or (meta adj5 analys*) or sham or effectiveness or efficacy or compar*).ti,ab.                                                                     | 4433360 |
| 5 | 3 and 4                                                                                                                                                                                                                                                                                                                                                                                                                                                 | 561     |
| 6 | randomized controlled trial/ or ct.fs. or random*.mp. or (doubl* adj blind*).mp.                                                                                                                                                                                                                                                                                                                                                                        | 1053311 |
| 7 | 3 and 6                                                                                                                                                                                                                                                                                                                                                                                                                                                 | 305     |
| 8 | 5 or 7                                                                                                                                                                                                                                                                                                                                                                                                                                                  | 562     |
| 9 | 5 not 7                                                                                                                                                                                                                                                                                                                                                                                                                                                 | 257     |

| # | EBM Reviews – CCTR                                                                                                                                                                                                                                                                                                                                                                                                                                                                                                                  | Results |
|---|-------------------------------------------------------------------------------------------------------------------------------------------------------------------------------------------------------------------------------------------------------------------------------------------------------------------------------------------------------------------------------------------------------------------------------------------------------------------------------------------------------------------------------------|---------|
| 1 | Zinc/ or Zinc Acetate/ or (zinc/ and acetic acid/) or (zinc adj2 acetate).ti,ab. or Zinc Sulfate/ or (zinc/ and sulfates/) or (zinc adj2 sulfate*).ti,ab. or (zinc/ and gluconates/) or (zinc adj2 gluconate).ti,ab. or zinc.ti,ab. or ("ascaro L 15" or "blue powder" or "CCRIS 1582" or CCRIS1582 or "EINECS 231-175-3" or "EINECS 2311753" or EINECS2311753 or "HSDB 1344" or HSDB1344 or jasad or "LS 2" or LS2 or "LS 6" or LS6 or merrillite* or rheinzink or "zincum metallicum").mp. or gluconate zinc/ or zinc derivative/ | 2252    |
| 2 | exp respiratory tract infections/ or (common adj2 cold*).ti,ab. or (upper adj2 respiratory).ti,ab. or (cold or colds).ti,ab. or Rhinovirus/ or rhinovirus*.ti,ab. or exp Rhinovirus infection/ or exp rhinovirus/                                                                                                                                                                                                                                                                                                                   | 11722   |
| 3 | 1 and 2                                                                                                                                                                                                                                                                                                                                                                                                                                                                                                                             | 89      |

| #  | CINAHL                                                                                                                                                                                                             | Results |
|----|--------------------------------------------------------------------------------------------------------------------------------------------------------------------------------------------------------------------|---------|
| S1 | (MH "Zinc") OR "zinc" OR (MH "Zinc Sulfate") OR (MH "Zinc Compounds")                                                                                                                                              | 2628    |
| S2 | (TX Zinc*)                                                                                                                                                                                                         | 2834    |
| S3 | S1 or S2                                                                                                                                                                                                           | 2834    |
| S4 | (MH "Respiratory Tract Infections+")                                                                                                                                                                               | 30585   |
| S5 | (TX rhinovir*)                                                                                                                                                                                                     | 154     |
| S6 | S4 or S5                                                                                                                                                                                                           | 30640   |
| S7 | S3 and S6                                                                                                                                                                                                          | 206     |
| S8 | (MH "Double-Blind Studies") OR (MH "Randomized Controlled Trials") OR (MH "Single-Blind Studies") OR (MH "Triple-Blind Studies") OR (MH "Multicenter Studies") OR (MH "Meta Analysis") OR (TX random*) OR (TX rct) | 135136  |
| S9 | S7 and S8                                                                                                                                                                                                          | 57      |

| # | AMED                                                                                                                                                                                                                                                                                                                                                           | Results |
|---|----------------------------------------------------------------------------------------------------------------------------------------------------------------------------------------------------------------------------------------------------------------------------------------------------------------------------------------------------------------|---------|
| 1 | Zinc/ or (zinc adj2 acetate).mp. or (zinc adj2 sulfate*).mp. or (zinc adj2 gluconate).mp. or zinc.mp. or ("ascaro L 15" or "blue powder" or "CCRIS 1582" or CCRIS1582 or "EINECS 231-175-3" or "EINECS 2311753" or EINECS2311753 or "HSDB 1344" or HSDB1344 or jasad or "LS 2" or LS2 or "LS 6" or LS6 or merrillite* or rheinzink or "zincum metallicum").mp. | 266     |
| 2 | exp respiratory tract infections/ or (common adj2 cold*).ti,ab. or (upper adj2 respiratory).ti,ab. or (cold or colds).ti,ab. or rhinovirus*.ti,ab.                                                                                                                                                                                                             | 1446    |
| 3 | 1 and 2                                                                                                                                                                                                                                                                                                                                                        | 14      |
