# Supplementary material
Source: PubMed Central journal article supplement (PMC3394849)
Supplement: supp_111990_zinc-science-2-at.pdf [file supp_111990_zinc-science-2-at.pdf]

**Appendix 2 (as supplied by the authors): Details of contacting authors**

| <b>Author</b>      | <b>Requested Information</b>                                                                                                                                                               | <b>Contacted</b>                     | <b>Reply</b>                |
|--------------------|--------------------------------------------------------------------------------------------------------------------------------------------------------------------------------------------|--------------------------------------|-----------------------------|
| <b>Dr. Farr</b>    | <ul style="list-style-type: none"> <li>• Mean (SD) duration of symptoms in groups</li> <li>• Severity of symptom scores in groups</li> </ul>                                               | April 19, 2011                       | Data no longer available    |
| <b>Dr. Kurugol</b> | <ul style="list-style-type: none"> <li>• Median provided – requested mean and standard deviation</li> <li>• Questioned whether patients from 2006 and 2007 trials were the same</li> </ul> | April 19, May 31, September 30, 2011 | No response                 |
| <b>Dr. Macknin</b> | <ul style="list-style-type: none"> <li>• Mean and SD duration of symptoms</li> </ul>                                                                                                       | April 19, 2011                       | Data no longer available    |
| <b>Dr. Mossad</b>  | <ul style="list-style-type: none"> <li>• Mean and SD duration of symptoms</li> </ul>                                                                                                       | April 19, 2011                       | Data provided               |
| <b>Dr. Prasad</b>  | <ul style="list-style-type: none"> <li>• Number of patients with symptoms at 3 and 7 days</li> <li>• Number of patients with side effects</li> </ul>                                       | April 19, 2011                       | All data published in paper |
| <b>Dr. Turner</b>  | <ul style="list-style-type: none"> <li>• Number with symptoms at 3 and 7 days</li> </ul>                                                                                                   | April 19 2011                        | Data provided               |
