# Supplementary material
Source: PubMed Central journal article supplement (PMC3394849)
Supplement: supp_111990_zinc-science-3-at.pdf [file supp_111990_zinc-science-3-at.pdf]

### Appendix 3 (as supplied by the authors): Subgroup credibility

| Sun et al. Criteria(23)                                             | Duration of Symptoms      |                 |                       | Severity of Symptoms      |                 |                       |
|---------------------------------------------------------------------|---------------------------|-----------------|-----------------------|---------------------------|-----------------|-----------------------|
|                                                                     | Age (children vs. adults) | Ionic Zinc Dose | Zinc formulation      | Age (children vs. adults) | Ionic Zinc Dose | Zinc formulation      |
| <b>DESIGN</b>                                                       |                           |                 |                       |                           |                 |                       |
| Variable measured at baseline                                       | Y                         | Y               | Y                     | Y                         | Y               | Y                     |
| Comparison within study                                             | N                         | N               | N                     | N                         | N               | N                     |
| <i>A priori</i> hypothesis                                          | Y                         | Y               | Y                     | Y                         | Y               | Y                     |
| Direction specified <i>a priori</i>                                 | Y                         | Y               | Y                     | Y                         | Y               | Y                     |
| Small number subgroups                                              | N                         | N               | N                     | N                         | N               | N                     |
| <b>ANALYSIS</b>                                                     |                           |                 |                       |                           |                 |                       |
| Interaction test significant                                        | Y                         | Y               | Y                     | Y                         | Y               | Y                     |
| Is effect independent                                               | Y                         | N <sup>#</sup>  | N <sup>§</sup>        | N                         | N               | N                     |
| <b>CONTEXT</b>                                                      |                           |                 |                       |                           |                 |                       |
| Large size of subgroup effect                                       | Y                         | Y               | Y                     | N                         | N               | N                     |
| Interaction consistent across studies                               | N/A                       | N/A             | N*                    | N/A                       | N/A             | N*                    |
| Interaction consistent across closely related outcomes within study | Y**                       | Y               | Y                     | Y                         | Y               | Y                     |
| Biologic rationale                                                  | Y                         | Y               | Y                     | Y                         | Y               | Y                     |
| <b>Total Number</b>                                                 | 8                         | 7               | 7                     | 6                         | 6               | 6                     |
| <b>Conclusion</b>                                                   | Plausible                 | Plausible       | Likely related to iZn | Possible                  | Possible        | Likely related to iZn |

# Zinc formulations release varying amounts of ionic zinc (zinc acetate releases 100% ionized zinc)

§ Zinc sulfate was used exclusively in children (syrup formulation) and zinc acetate (tablets/lozenges) used exclusively in adults.

\*Turner et al.(24) had three zinc arms (zinc acetate, two doses zinc gluconate); zinc gluconate arm had reduction in duration of symptoms but zinc acetate did not (opposite of observed subgroup effect). No difference in severity of symptoms in those on zinc gluconate or zinc acetate.

\*\* Subgroup effect could not be assessed for presence of symptoms at 3 and 7 days because of only 1 pediatric trial reporting these outcomes. But, reduction in severity of symptoms was seen in adults but not children.
