# Supplementary material
Source: PubMed Central journal article supplement (PMC3394849)

**Appendix 4 (as supplied by the authors): Risk of bias graph: review authors' judgments about each risk of bias item presented as percentages across all included studies**

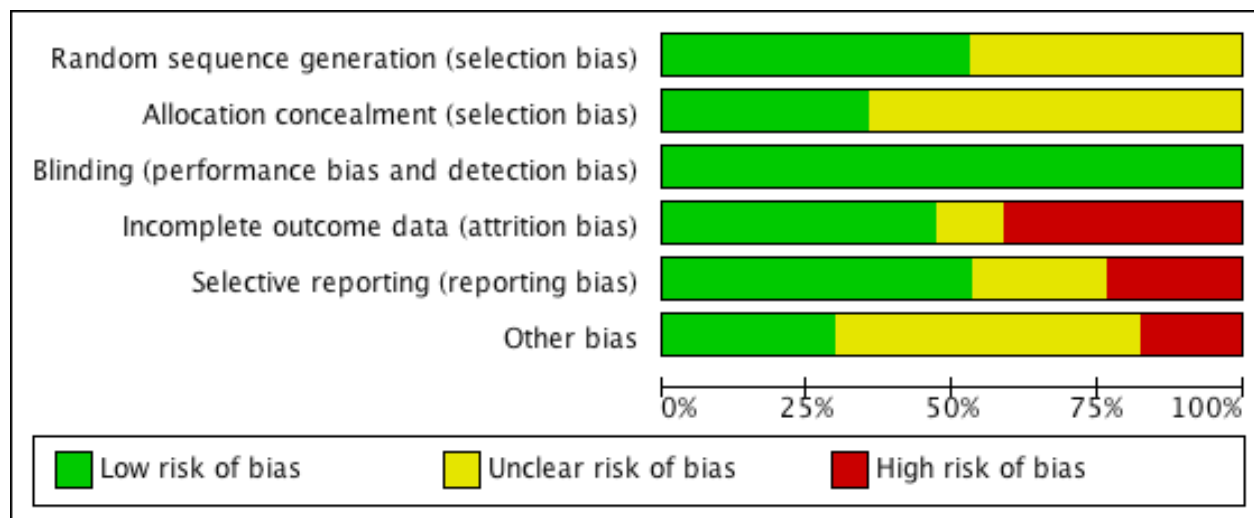

Supplement: supp_111990_zinc-science-4-at.pdf [file supp_111990_zinc-science-4-at.pdf]
