# Supplementary material
Source: PubMed Central journal article supplement (PMC3394849)
Supplement: supp_111990_zinc-science-6-at.pdf [file supp_111990_zinc-science-6-at.pdf]

**Appendix 6 (as supplied by the authors): Summary of results from subgroup analyses**

| Outcome                                        | Trials (patients) | Effect Estimate (95% CI) | P value  | I <sup>2</sup> (%) | Subgroup Difference (p value) |
|------------------------------------------------|-------------------|--------------------------|----------|--------------------|-------------------------------|
| <b>CHILDREN VS ADULTS</b>                      |                   |                          |          |                    |                               |
| <b>Duration of Symptoms</b>                    |                   |                          |          |                    |                               |
| Children                                       | 3 (563)           | -0.26 (-0.78, 0.25)      | 0.32     | 84                 | < 0.0001                      |
| Adults                                         | 5 (371)           | -2.63 (-3.69, -1.58)     | <0.00001 | 82                 |                               |
| <b>Severity of Symptoms</b>                    |                   |                          |          |                    |                               |
| Children                                       | 2 (314)           | -0.05 (-0.27, 0.17)      | 0.67     | 0                  | 0.01                          |
| Adults                                         | 2 (98)            | -0.64 (-1.05, -0.24)     | 0.002    | 0                  |                               |
| <b>Presence of Symptoms at 3 Days</b>          |                   |                          |          |                    |                               |
| Children                                       | 1 (249)           | 1.00 (0.97, 1.03)        | 0.99     |                    | 0.10                          |
| Adults                                         | 7 (1003)          | 0.90 (0.79, 1.02)        | 0.09     | 74                 |                               |
| <b>Presence of Symptoms at 7 Days</b>          |                   |                          |          |                    |                               |
| Children                                       | 1 (249)           | 0.85 (0.69, 1.04)        | 0.11     |                    | 0.13                          |
| Adults                                         | 8 (1076)          | 0.57 (0.35, 0.91)        | 0.02     | 80                 |                               |
| <b>INDUCED VS. NATURALLY ACQUIRED COLDS</b>    |                   |                          |          |                    |                               |
| Not enough trials for subgroup                 |                   |                          |          |                    |                               |
| <b>ZINC FORMULATION</b>                        |                   |                          |          |                    |                               |
| <b>Duration of Symptoms</b>                    |                   |                          |          |                    |                               |
| Zinc Acetate                                   | 3 (199)           | -2.67 (-3.96, -1.38)     | <0.0001  | 87                 | 0.003                         |
| Zinc Gluconate                                 | 3 (421)           | -1.72 (-3.89, 0.44)      | 0.12     | 87                 |                               |
| Zinc Sulfate                                   | 2 (314)           | -0.31 (-0.89, 0.28)      | 0.31     | 92                 |                               |
| <b>Severity of Symptoms</b>                    |                   |                          |          |                    |                               |
| Zinc Acetate                                   | 2 (98)            | -0.64 (-1.05, -0.24)     | 0.002    | 0                  | 0.01                          |
| Zinc Gluconate                                 | 0                 |                          |          |                    |                               |
| Zinc Sulfate                                   | 2 (314)           | -0.05 (-0.27, 0.17)      | 0.67     | 0                  |                               |
| <b>Presence of Symptoms at 3 Days</b>          |                   |                          |          |                    |                               |
| Zinc Acetate                                   | 1 (48)            | 0.65 (0.48, 0.87)        | 0.004    |                    | 0.02                          |
| Zinc Gluconate                                 | 5 (653)           | 0.95 (0.85, 1.06)        | 0.36     | 81                 |                               |
| Zinc Sulfate                                   | 0                 |                          |          |                    |                               |
| <b>Presence of Symptoms at 7 Days</b>          |                   |                          |          |                    |                               |
| Zinc Acetate                                   | 1 (48)            | 0.03 (0.00, 0.47)        | 0.01     |                    | 0.03                          |
| Zinc Gluconate                                 | 6 (726)           | 0.61 (0.39, 0.97)        | 0.04     | 82                 |                               |
| Zinc Sulfate                                   | 0                 |                          |          |                    |                               |
| <b>HIGH DOSE VS. LOW DOSE IONIZED ZINC</b>     |                   |                          |          |                    |                               |
| <b>Duration of Symptoms</b>                    |                   |                          |          |                    |                               |
| High Dose                                      | 3 (171)           | -2.75 (-3.89, -1.60)     | <0.00001 | 78                 | 0.005                         |
| Low Dose                                       | 5 (763)           | -0.84 (-1.50, -0.18)     | 0.01     | 89                 |                               |
| <b>Severity of Symptoms</b>                    |                   |                          |          |                    |                               |
| High Dose                                      | 2 (98)            | -0.64 (-1.05, -0.24)     | 0.002    | 0                  | 0.01                          |
| Low Dose                                       | 2 (314)           | -0.05 (-0.27, 0.17)      | 0.67     | 0                  |                               |
| <b>Presence of Symptoms at 3 Days</b>          |                   |                          |          |                    |                               |
| High Dose                                      | 3 (223)           | 0.77 (0.48, 1.26)        | 0.31     | 92                 | 0.41                          |
| Low Dose                                       | 3 (478)           | 0.96 (0.84, 1.08)        | 0.52     | 75                 |                               |
| <b>Presence of Symptoms at 7 Days</b>          |                   |                          |          |                    |                               |
| High Dose                                      | 4 (296)           | 0.32 (0.12, 0.87)        | 0.03     | 79                 | 0.14                          |
| Low Dose                                       | 3 (478)           | 0.79 (0.41, 1.54)        | 0.49     | 87                 |                               |
| <b>HIGH RISK OF BIAS VS. LOW RISK OF BIAS*</b> |                   |                          |          |                    |                               |
| <b>Duration of Symptoms</b>                    |                   |                          |          |                    |                               |

|                                                     |         |                      |        |    |      |
|-----------------------------------------------------|---------|----------------------|--------|----|------|
| <b>Low risk of bias</b>                             | 6 (760) | -1.78 (-2.80, -0.76) | 0.0006 | 96 | 0.44 |
| <b>High risk of bias</b>                            | 2 (174) | -1.29 (-2.00, -0.58) | 0.0004 | 0  |      |
| <b>Severity of Symptoms</b>                         |         |                      |        |    |      |
| <b>Low risk of bias</b>                             | 4 (412) | -0.27 (-0.58, 0.05)  | 0.09   | 55 |      |
| <b>High risk of bias</b>                            | 0       |                      |        |    |      |
| <b>Presence of Symptoms at 3 Days</b>               |         |                      |        |    |      |
| <b>Low risk of bias</b>                             | 3 (396) | 0.81 (0.51, 1.29)    | 0.38   | 95 | 0.46 |
| <b>High risk of bias</b>                            | 5 (856) | 0.97 (0.87, 1.08)    | 0.60   | 60 |      |
| <b>Presence of Symptoms at 7 Days</b>               |         |                      |        |    |      |
| <b>Low risk of bias</b>                             | 3 (396) | 0.36 (0.11, 1.23)    | 0.10   | 88 | 0.32 |
| <b>High risk of bias</b>                            | 6 (929) | 0.70 (0.45, 1.08)    | 0.10   | 76 |      |
| <b>SYMPTOM DURATION PRIOR TO INTERVENTION</b>       |         |                      |        |    |      |
| <b>Duration of Symptoms</b>                         |         |                      |        |    |      |
| < 24 hours                                          | 5 (640) | -2.24 (-3.84, -0.63) | 0.006  | 96 | 0.13 |
| ≥ 24 hours                                          | 3 (294) | -0.76 (-1.79, 0.28)  | 0.15   | 82 |      |
| <b>Severity of Symptoms</b>                         |         |                      |        |    |      |
| < 24 hours                                          | 3 (292) | -0.39 (-0.86, 0.09)  | 0.11   | 67 | 0.29 |
| ≥ 24 hours                                          | 1 (120) | -0.07 (-0.43, 0.29)  | 0.71   | 0  |      |
| <b>Presence of Symptoms at 3 Days</b>               |         |                      |        |    |      |
| < 24 hours                                          | 4 (526) | 0.88 (0.73, 1.07)    | 0.21   | 89 | 0.62 |
| ≥ 24 hours                                          | 4 (726) | 0.94 (0.80, 1.10)    | 0.45   | 72 |      |
| <b>Presence of Symptoms at 7 Days</b>               |         |                      |        |    |      |
| < 24 hours                                          | 4 (526) | 0.64 (0.30, 1.36)    | 0.25   | 87 | 0.89 |
| ≥ 24 hours                                          | 5 (799) | 0.60 (0.40, 0.90)    | 0.01   | 62 |      |
| <b>FUNDING SOURCE</b>                               |         |                      |        |    |      |
| <b>All trials were industry funded</b>              |         |                      |        |    |      |
|                                                     |         |                      |        |    |      |
| <b>POST HOC ANALYSIS – EFFECT OF TASTE BLINDING</b> |         |                      |        |    |      |
| <b>Duration of Symptoms</b>                         |         |                      |        |    |      |
| <b>Potential inadequate taste blinding</b>          | 4 (522) | -1.57 (-2.93, -0.20) | 0.02   | 81 | 0.85 |
| <b>No Difference in taste</b>                       | 4 (412) | -1.74 (-2.90, -0.58) | 0.003  | 97 |      |

\**Low risk of bias*: a low risk of bias on  $\geq 5$  of 6 items on the risk of bias assessment and no item considered high risk. *High risk of bias*: any item considered high risk or low risk on  $< 5$  of 6 items.
