# Supplementary material
Source: PubMed Central journal article supplement (PMC3394849)

**Appendix 7 (as supplied by the authors): Additional analyses**

**FIGURE a. Adverse Events: Bad Taste**

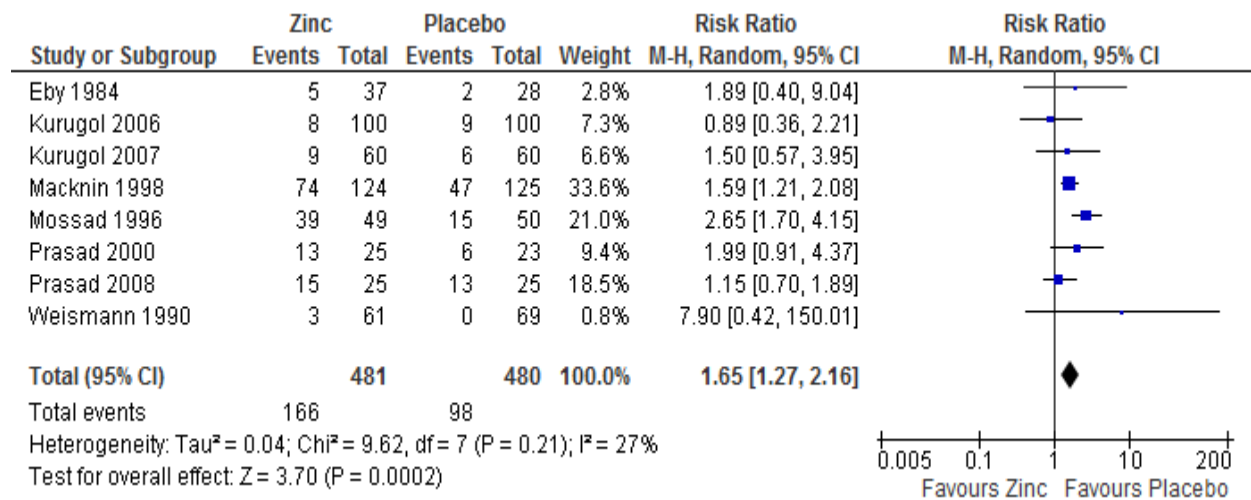

**FIGURE b. Adverse Events: Nausea**

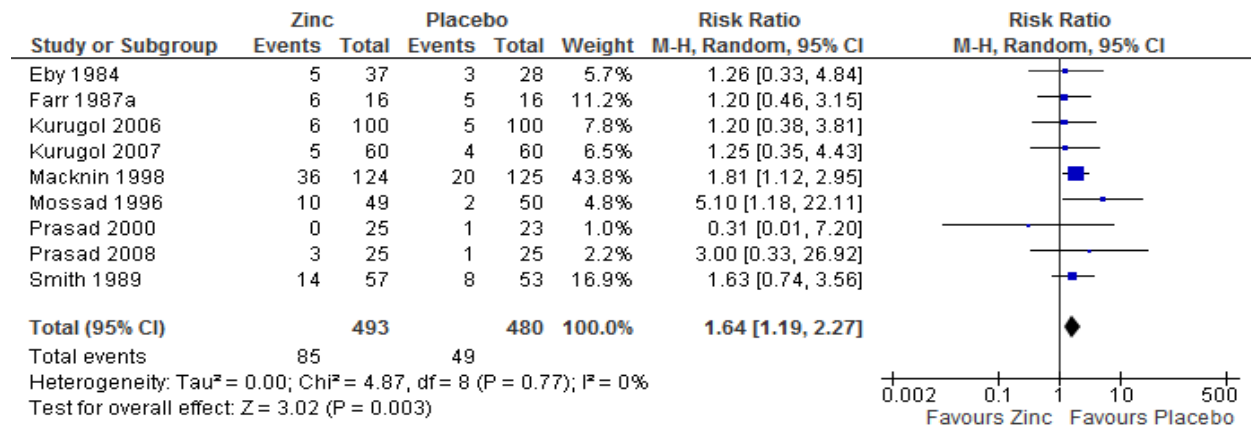

**FIGURE c. Adverse Events: Abdominal Pain**

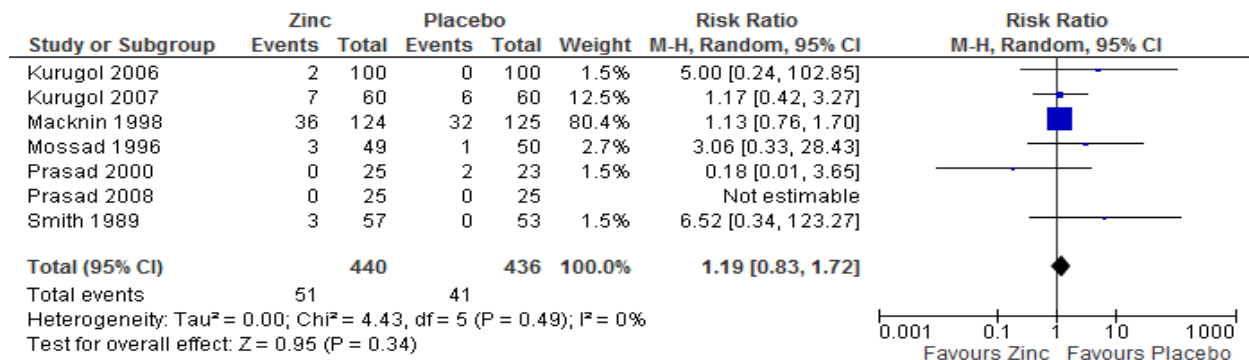

**FIGURE d. Adverse Events: Constipation**

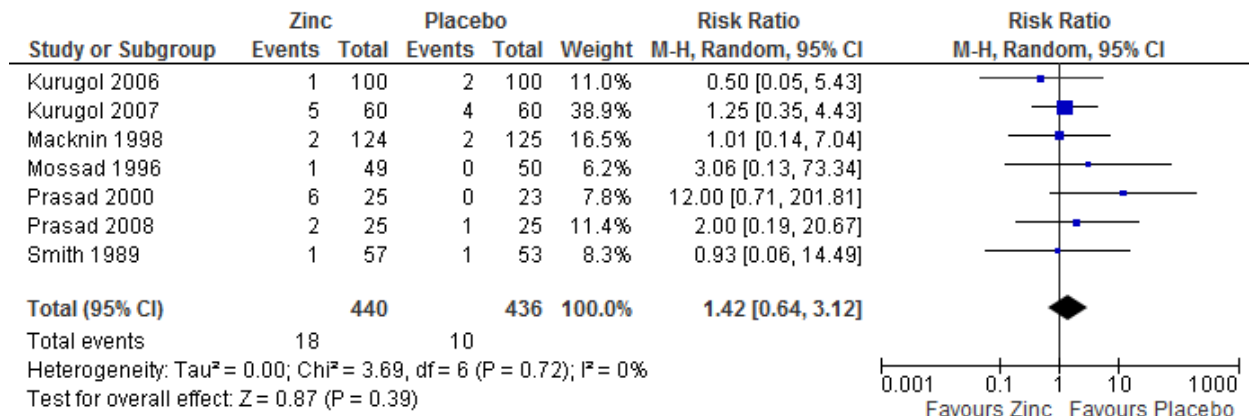

**FIGURE e. Adverse Events: Diarrhea**

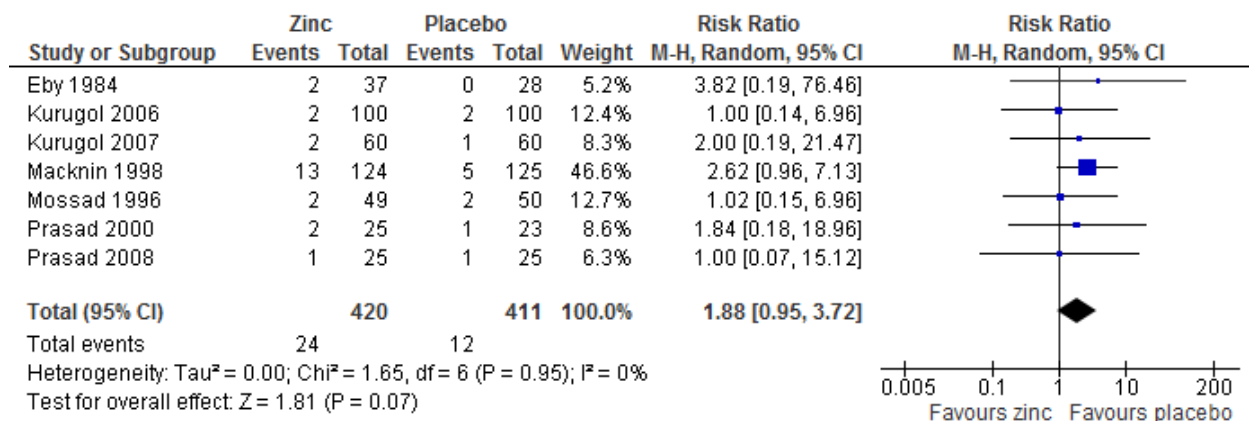

Supplement: supp_111990_zinc-science-7-at.pdf [file supp_111990_zinc-science-7-at.pdf]
